# Supplementary material
Source: publisher figshare collection journal article supplement (https://rs.figshare.com/ndownloader/files/13440080)
Supplement: Supplementary file 1 [file 13440080]

Appendix 1. Data on litter size, multiple paternity, and number of sires for mammalian populations.

| species | # litters | mean ls | % multiple paternity | mean # sires | reference |
| --- | --- | --- | --- | --- | --- |
| Virginia opossum, Didelphis virginiana | 64 | 8.7 | 0.406 | 1.4 | Beasley et al. 2010 |
| Stuart's antechinus, Antechinus stuartii | 39 | 4.4 | 0.923 | 2.8 | Holleley et al. 2006 |
| Agile antechinus, Antechinus agilis | 47 | 7.7 | 0.978 | 2.8 | Kraaijeveld-Smit et al. 2002 |
| Swamp antechinus, Antechinus minimus | 10 | 6.1 | 0.800 | 2.0 | Sale et al. 2013 |
| Spotted-tailed quoll, Dasyurus maculatus | 6 | 5.0 | 0.667 | 1.8 | Glen et al. 2009 |
| Honey possum, Tarsipes rostratus | 5 | 2.4 | 1.000 | 2.0 | Wooller et al. 2000 |
| Arctic fox, Vulpes lagopus | 8 | 5.4 | 0.125 | 1.1 | Carmichael et al. 2007 |
| Ethiopian wolf, Canis simensis | 12 | 4.7 | 0.333 | 1.3 | Randall et al. 2007 |
| African wild dog, Lycaon pictus | 6 | 4.2 | 0.167 | 1.2 | Girman et al. 1997 |
| Gray fox, Urocyon cinereoargenteus | 7 | 3.3 | 0.143 | 1.1 | Glenn et al. 2009 |
| Red fox, Vulpes vulpes | 12 | 3.8 | 0.500 | 1.8 | Baker et al. 2004 |
| Cheetah, Acinonyx jubatus | 23 | 3.0 | 0.435 | 1.5 | Gotelli et al. 2007 |
| Domestic cat, Felis catus | 92 | 3.8 | 0.554 | 1.8 | Natoli et al. 2007; Say et al. 1999 |
| Spotted hyena, Crocuta crocuta | 102 | 2.0 | 0.333 | 1.3 | Engh et al. 2002; East et al. 2003 |
| Striped hyena, Hyaena hyaena | 4 | 2.5 | 0.500 | 1.5 | Wagner et al. 2007 |
| Wolverine, Gulo gulo | 43 | 2.1 | 0.000 | 1.0 | Hedmark et al. 2007 |
| Eurasian badger, Meles meles | 174 | 2.0 | 0.396 | 1.4 | Dugdale et al. 2007; Carpenter et al. 2005 |
| Ermine, Mustela erminea | 5 | 8.4 | 0.200 | 1.2 | Holland & Gleeson 2005 |
| American mink, Neovison vison | 5 | 3.6 | 0.600 | 1.6 | Yamaguchi et al. 2004 |
| Guadeloupe racoon, Procyon lotor | 8 | 4.0 | 0.875 | 1.9 | Nielsen & Nielsen 2007 |
| American black bear, Ursus americanus | 5 | 2.4 | 0.200 | 1.2 | Onorato et al. 2004 |
| Brown bear, Ursus arctos | 69 | 2.0 | 0.145 | 1.1 | Bellemain et al. 2006 |
| North American Beaver, Castor canadensis | 9 | 3.7 | 0.556 | 1.6 | Crawford et al. 2008 |
| Cape dune mole rat, Bathyergus suillus | 19 | 2.7 | 0.263 | 1.3 | Bray et al. 2012 |
| Silvery mole rat, Heliophobius argenteocinereus | 11 | 3.5 | 0.091 | 1.1 | Patzenhauerová et al. 2010 |
| Brazilian guinea pig, Cavia aperea | 15 | 3.9 | 0.267 | 1.3 | Asher et al. 2008 |
| Brandt's vole, Lasiopodomys brandtii | 27 | 7.1 | 0.458 | 1.5 | Huo et al. 2011 |
| Prairie vole, Microtus ochrogaster | 9 | 4.8 | 0.556 | 1.6 | Solomon et al. 2004 |
| Tundra vole, Microtus oeconomus | 21 | 5.3 | 0.381 | 1.6 | Borkowska et al. 2009 |
| Red-backed vole, Myodes rutilus | 215 | 4.3 | 0.232 | 1.2 | Ishibashi & Saitoh 2008 |
| Big-eared woodrat, Neotoma macrotis | 25 | 2.2 | 0.200 | 1.2 | Matocq 2004 |
| Canyon mouse, Peromyscus crinitus | 10 | 3.8 | 0.200 | 1.2 | Shurtiff et al. 2005 |
| Striped ﬁeld mouse, Apodemus agrarius | 44 | 6.5 | 0.636 | 1.8 | Bryja et al. 2008; Baker et al. 1999 |
| Yellow-necked field mouse, Apodemus ﬂavicollis | 35 | 5.0 | 0.514 | 1.5 | Bryja et al. 2008; Gryczyńska-Siemiątkowska et al. 2008 |
| Wood mouse, Apodemus sylvaticus | 28 | 4.7 | 0.643 | 1.7 | Bryja et al. 2008; Baker et al. 1999 |
| Ural ﬁeld mouse, Apodemus uralensis | 46 | 5.0 | 0.435 | 1.4 | Bryja et al. 2008 |
| Natal multimammate mouse, Mastomys natalensis | 36 | 9.9 | 0.670 | 1.9 | Kennis et al. 2008 |
| House mouse, Mus musculus domesticus | 143 | 5.6 | 0.203 | 1.2 | Dean et al. 2006 |
| House mouse, Mus musculus musculus | 146 | 4.1 | 0.336 | 1.4 | Auclair et al. 2014 |
| Red squirrel, Tamiasciurus hudsonicus | 44 | 3.0 | 0.727 | 2.0 | Lane et al. 2008; Bonnano & Schulte-Hostedde 2009 |
| Southern flying squirrel, Glaucomys volans | 22 | 3.4 | 0.909 |  | Fokidis et al. 2007 |
| Eastern chipmunk, Tamias straitus | 43 | 2.8 | 0.860 | 2.5 | Bergeron et al. 2011 |
| Alpine marmot, Marmota marmota | 68 | 3.5 | 0.265 | 1.3 | Cohas et al. 2006 |
| Woodchuck, Marmota monax | 26 | 3.5 | 0.631 | 1.8 | Maher & Duron 2010 |
| Mexican ground squirrel, Ictidomys parvidens | 13 | 5.2 | 1.000 |  | Schwantz et al. 2016 |
| Columbian ground squirrel, Urocitellus columbianus | 147 | 3.0 | 0.578 | 1.8 | Raveh et al. 2010 |
| Columbian ground squirrel, Urocitellus columbianus | 29 | 2.8 | 0.724 | 1.9 | Jones et al. 2012 |
| Richardson's ground squirrel, Urocitellus richardsonii | 15 | 5.7 | 0.800 | 2.1 | Hare et al. 2004 |
| Round-tailed ground squirrel, Xerospermophilus tereticaudus | 31 | 4.1 | 0.548 | 2.5 | Munroe & Koprowski 2011 |
| Pronghorn, Antilocapra smericana | 25 | 2.0 | 0.440 | 1.4 | Carling et al. 2003 |
| Mouflon, Ovis aries | 80 | 2.0 | 0.738 | 1.7 | Penberton et al. 1999 |
| Roe deer, Capreolus capreolus | 33 | 2.1 | 0.155 | 1.2 | Vanpe et al. 2009 |
| White-tailed deer, Odocoileus virginianus | 27 | 2.1 | 0.259 | 1.3 | Sorin 2004 |
| White-tailed deer, Odocoileus virginianus | 27 | 2.0 | 0.370 | 1.4 | Neuman et al. 2016 |
| Wild boar, Sus scrofa | 30 | 4.5 | 0.100 | 1.1 | Poteau et al. 2009; Delgado et al. 2008 |
| White-toothed shrew, Crocidura russula | 42 | 2.3 | 0.000 | 1.0 | Bouteiller & Perrin 2000 |
| Asian lesser white-toothed shrew, Crocidura shantungensis | 18 | 3.0 | 0.277 | 1.3 | Lin et al. 2009 |
| Big brown bat, Eptesicus fuscus | 26 | 2.0 | 0.462 | 1.5 | Vonhof et al. 2006 |
| Western European hedgehog, Erinaceus europaeus | 5 | 5.0 | 0.400 | 1.4 | Moran et al. 2009 |
| Snowshoe hare, Lepus americanus | 16 | 4.0 | 0.250 | 1.3 | Burton 2002 |
| Large treeshrew, Tupaia tana | 9 | 2.0 | 0.333 | 1.3 | Munshi-South 2007 |
| Gray mouse lemur, Microcebus murinus | 26 | 2.0 | 0.654 | 1.7 | Eberle & Kappeler 2004 |

**DATA REFERENCES**

Asher M, et al. (2008) Large males dominate: Ecology, social organization, and mating system of wild cavies, the ancestors of the guinea pig. Behav Ecol Sociobiol 62:1509**-**1521.

Auclair Y, König B, Lindholm AK (2014) Socially mediated polyandry: a new benefit of communal nesting in mammals. Behav Ecol 25:1467-1473.

Baker PJ, Funk SM, Bruford MW, Harris S (2004) Polygynandry in a red fox population: Implications for the evolution of group living in canids? Behav Ecol 15:766**–**778.

Baker RJ, Makova KD, Chesser RK (1999) Microsatellites indicate a high frequency of multiple paternity in Apodemus (Rodentia). Mol Ecol 8:107**–**111.

Beasley JC, Beatty WS, Olson ZH, Rhodes OE Jr. (2010) A genetic analysis of the Virginia opossum mating system: Evidence of multiple paternity in a highly fragmented landscape. J Hered 101:368**–**373.

Bellemain E, Swenson JE, Taberlet P (2006) Mating strategies in relation to sexually selected infanticide in a non-social carnivore: The brown bear. Ethology 112:238**–**246.

Bergeron P, Réale D, Humphries MM, Garant D (2011) Evidence of multiple paternity and mate selection for inbreeding avoidance in wild eastern chiipmunks. J Evol Biol 24:1685-1694.

Bonnano VL, Schulte-Hostedde AI (2009) Sperm competition and ejaculate investment in red squirrels (Tamiasciurus hudsonicus). Behav Ecol Sociobiol 63:835**–**846.

Borkowska A, Borowski Z, Krysiuk K (2009) Multiple paternity in free-living root voles (Microtus oeconomus). Behav Processes 82:211**–**213.

Bray TC, Bloomer P, O’Riain MJ, Bennett NC (2012) How attractive is the girl next door? An assessment of spatial mate acquisition and paternity in the solitary Cape dune mole-rat, Bathyergus suillus. PLoS ONE 7:e39866.

Bouteiller C, Perrin N (2000) Individual reproductive success and effective population size in the greater white-toothed shrew Crocidura russula. Proc Biol Sci 267:701**–**705.

Bryja J, et al. (2008) Varying levels of female promiscuity in four Apodemus mice species. Behav Ecol Sociobiol 63:251**–**260.

Burton C (2002) Microsatellite analysis of multiple paternity and male reproductive success in the promiscuous snowshoe hare. Can J Zool 80:1948**–**1956.

Carling MD, Wiseman PA, Byers JA (2003) Microsatellite analysis reveals multiple paternity in a population of wild pronghorn antelopes (Antilocapra americana). J Mammal 84:1237**–**1243.

Carmichael LE, et al. (2007) Free love in the far north: Plural breeding and polyandry of arctic foxes (Alopex lagopus) on Bylot Island, Nunavut. Can J Zool 85:338**–**343.

Carpenter PJ, et al. (2005) Mating system of the Eurasian badger, Meles meles, in a high density population. Mol Ecol 14:273**–**284.

Cohas A, Yoccoz NG, Da Silva A, Goossens B, Allaine D (2006) Extra-pair paternity in the monogamous alpine marmot (Marmota marmota): The roles of social setting and female mate choice. Behav Ecol Sociobiol 59:597**–**605.

Crawford JC, Liu Z, Nelson TA, Nelson CK, Bloomquist CK (2008) Microsatellite analysis of mating and kinship in beavers (Castor canadensis). J Mammal 89:575**–**581.

Delgado R, Fernández-Llario P, Azevedo M, Beja-Pereira A, Santos P (2008) Paternity assessment in free-ranging wild boar (Sus scrofa)**—**Are littermates full-sibs? Mamm Biol 73:169**–**176.

Dean MD, Ardlie KG, Nachman MW (2006) The frequency of multiple paternity suggests that sperm competition is common in house mice (Mus domesticus). Mol Ecol 15:4141**-**4151.

Dugdale HL, Macdonald DW, Pope LC, Burke T (2007) Polygynandry, extra-group paternity and multiple-paternity litters in European badger (Meles meles) social groups. Mol Ecol 16:5294**–**5306.

East ML, Burke T, Wilhelm K, Greig C, Hofer H (2003) Sexual conflicts in spotted hyenas: Male and female mating tactics and their reproductive outcome with respect to age, social status and tenure. Proc Biol Sci 270:1247**–**1254.

Eberle M, Kappeler PM (2004) Selected polyandry: Female choice and inter-sexual conflict in a small nocturnal solitary primate (*Microcebus murinus*). Behav Ecol Sociobiol 57:91**–**100.

Engh AL, et al. (2002) Reproductive skew among males in a female-dominated mammalian society. Behav Ecol 13:193**–**200.

Fokidis HB, Risch TS, Glenn TC (2007) Reproductive and resource benefits to large female body size in a mammal with female-biased sex size dimorphism. Anim Behav 73:479-488.

Girman DJ, Mills MGL, Geffen E, Wayne RK (1997) A molecular genetic analysis of social structure, dispersal, and interpack relationships of the African wild dog (*Lycaon pictus*). Behav Ecol Sociobiol 40:187**–**198.

Glen AS, Cardoso MJ, Dickman CR, Firestone KB (2009) Who**’**s your daddy? Paternity testing reveals promiscuity and multiple paternity in the carnivorous marsupial *Dasyurus* *maculates* (Marsupialia: Dasyuridae). Biol J Linn Soc Lond 96:1**–**7.

Glenn JLW, Civitello DJ, Lance SL (2009) Multiple paternity and kinship in the gray fox (*Urocyon cinereoargenteus*). Mamm Biol 74:394**–**402.

Gottelli D, Wang J, Bashir S, Durant SM (2007) Genetic analysis reveals promiscuity among female cheetahs. Proc Biol Sci 274:1993**–**2001.

Gryczy**ń**ska-Siemi**ą**tkowska A, et al. (2008) Multiple paternity in a wild population of the yellow-necked mouse *Apodemus flavicollis*. Acta Ther 53:251**–**258.

Hare JF, Todd G, Untereiner WA (2004) Multiple mating results in multiple paternity in Richardson’s ground squirrels, Spermophilus richardsonii. Can Field-Nat 118:90-94.

Hedmark E, Persson J, Segerström P, Landa A, Ellegren H (2007) Paternity and mating system in wolverines Gulo gulo. Wildl Biol 13(S2):13**–**30.

Holland OJ, Gleeson DM (2005) Genetic characterization of blastocysts and the identification of an instance of multiple paternity in the stoat (*Mustela erminea*). Conserv Genet 6:855**–**858.

Holleley CE, Dickman CR, Crowther MS, Oldroyd BP (2006) Size breeds success: Multiple paternity, multivariate selection and male semelparity in a small marsupial, *Antechinus stuartii*. Mol Ecol 15:3439**–**3448.

Huo Y-J, Wan X-R, Wolff JO, Wang G, Thomas S, Iglay RB, Leopold BD, Liu W (2011) Multiple paternities increase genetic diversity of offspring in Brandt’s voles. Behav Proc 84:745-749.

Ishibashi Y, Saitoh T (2008) Effect of local density of males on the occurrence of multimale mating in gray-sided voles (Myodes rufocanus). J Mammal 89:388**–**397.

Jones PH, Van Zant JL, Dobson FS (2012) Variation in reproductive success of male and female Columbian ground squirrels (*Urocitellus columbianus*). Can J Zool 90:736-743.

Kennis J, Sluydts V, Leirs H, van Hooft WF (2008) Polyandry and polygyny in an African rodent species, Mastomys natalensis. Mammalia 72:150**–**160.

Kraaijeveld-Smit FJL, Ward SJ, Temple-Smith PD (2002) Multiple paternity in a field population of a small carnivorous marsupial, the agile antechinus, Antechinus agilis. Behav Ecol Sociobiol 52:84**–**91.

Lane JE, Boutin S, Gunn MR, Slate J, Coltman DW (2008) Female multiple mating and paternity in free-ranging North American red squirrels. Anim Behav 75:1927**–**1937.

Lin TT, You EM, Lin YK (2009) Social and genetic mating systems of the Asian lesser white-toothed shrew, Crocidura shantungensis, in Taiwan. J Mammal 90:1370**–**1380.

Matocq MD (2004) Reproductive success and effective population size in woodrats (Neotoma macrotis). Mol Ecol 13:1635**–**1642.

Maher CR, Duron M (2010) Mating system and paternity in woodchucks (Marmota monax). J Mammal 91:628-635.

Moran S, Turner PD, O**’**Reilly C (2009) Multiple paternity in the European hedgehog. J Zool (Lond) 278:349**–**353.

Munroe KE, Koprowski JL (2011) Sociality, Bateman’s gradient, and the polygynandrous genetic mating system of round-tailed ground squirrels (*Xerospermophilus tereticaudus*). Behav Ecol Sociobiol 65:1811-1824.

Munshi-South J (2007) Extra-pair paternity and the evolution of testis size in a behaviorally monogamous tropical mammal, the large treeshrew (Tupaia tana). Behav Ecol Sociobiol 62:201**–**212.

Natol E, Schmid M, Say L, Pontier D (2007) Male reproductive success in a social group of urban feral cats (Felis catus L.). Ethology 113:283**–**289.

Neuman TJ, Newbolt CH, Ditchkoff SS, Steury TD (Microsatellites reveal plasticity in reproductive success of white-tailed deer. J Mammal 97:1441-1450.

Nielsen CLR, Nielsen CK (2007) Multiple paternity and relatedness in southern Illinois raccoons (Procyon lotor). J Mammal 88:441**–**447.

Onorato DP, Hellgren EC, Van Den Bussche RA, Skiles JR (2004) Paternity and relatedness of American black bears recolonizing a desert montane island. Can J Zool 82:1201**–**1210.

Patzenhauerová H, Bryja J, **Š**umbera R (2010) Kinship structure and mating system in a solitary subterranean rodent, the silvery mole-rat. Behav Ecol. Sociobiol 64:757-767.

Pemberton JM, Coltman DW, Smith JA, Pilkington JG (1999) Molecular analysis of a promiscuous, fluctuating mating system. Biol J Lin Soc 68:289**–**301.

Poteaux C, et al. (2009) Socio-genetic structure and mating system of a wild boar population. J Zool (Lond) 278:116**–**125.

Randall DA, et al. (2007) Inbreeding is reduced by female-biased dispersal and mating behavior in Ethiopian wolves. Behav Ecol 18:579**–**589.

Raveh S, et al. (2010) Mating order and reproductive success in male Columbia ground squirrels (*Urocitellus columbianus*). Behav Ecol 21:537**–**547.

Sale MG, Kraaijeveld-Smit FJL, Arnould JPY (2013) Multiple paternity in the swamp antechinus (*Antechinus minimus*). Aust Mammal 35:227-230.

Say L, Pontier D, Natoli E (1999) High variation in multiple paternity of domestic cats (*Felis catus* L.) in relation to environmental conditions. Proc Biol Sci 266:2071**–**2074.

Schwantz LE, Sherwin WB, Ognenovska K, Lacey EA (2016) Paternity and male mating strategies of a ground squirrel (*Ictidomys parvidens*) with an extended mating season. J Mammal 97:576-588.

Shurtliff QR, Pearse DE, Rogers DS (2005) Parentage analysis of the canyon mouse (*Peromyscus crinitus*): Evidence for multiple paternity. J Mammal 86:531**–**540.

Solomon NG, Keane B, Knoch LR, Hogan PJ (2004) Multiple paternity in socially monogamous prairie voles (Microtus ochrogaster). Can J Zool 82:1667**–**1671.

Sorin AB (2004) Paternity assignment for white-tailed deer (Odocoileus virginianus): Mating across age classes and multiple paternity. J Mammal 85:356**–**362.

Vanpé C, et al. (2009) Multiple paternity occurs with low frequency in the territorial roe deer, Capreolus capreolus. Biol J Linn Soc Lond 97:128**–**139.

Vonhof MJ, Barber D, Fenton MB, Strobeck C (2006) A tale of two siblings: Multiple paternity in big brown bats (Eptesicus fuscus) demonstrated using microsatellite markers. Mol Ecol 15:241**–**247.

Wagner AP, Creel S, Frank LG, Kalinowski ST (2007) Patterns of relatedness and parentage in an asocial, polyandrous striped hyena population. Mol Ecol 16:4356**–**4369.

Wooller RD, Richardson KC, Garavanta CAM, Saffer VM, Bryant KA (2000) Opportunistic breeding in the polyandrous honey possum, Tarsipes rostratus. Aust J Zool 48:669**–**680.

Yamaguchi N, Sarno RJ, Johnson WE, O**’**Brien SJ, Macdonald DW (2004) Multiple paternity and reproductive tactics of free-ranging American minks, Mustela vison. J Mammal 85:432**–**439.
